# Supplementary material for: Breeding Population and Nesting Habitat of Skuas in the Harmony Point Antarctic Specially Protected Area
Source: MDPI journal article supplement (doi:10.3390/d15050638), 2023-05-09
Supplement: s1 [file s1]

# Supplemental material to ‘Breeding population and nesting habitat of skuas in the Harmony Point Antarctic specially protected area’

Francisco Santa Cruz<sup>1</sup>, Lucas Krüger<sup>1,2</sup>

1 Instituto Antártico Chileno, Plaza Muñoz Gamero 1055, Punta Arenas, Chile

2 Millennium Institute Biodiversity of Antarctic and Subantarctic Ecosystems (BASE), Las Palmeras 3425, Ñuñoa, Santiago, Chile.

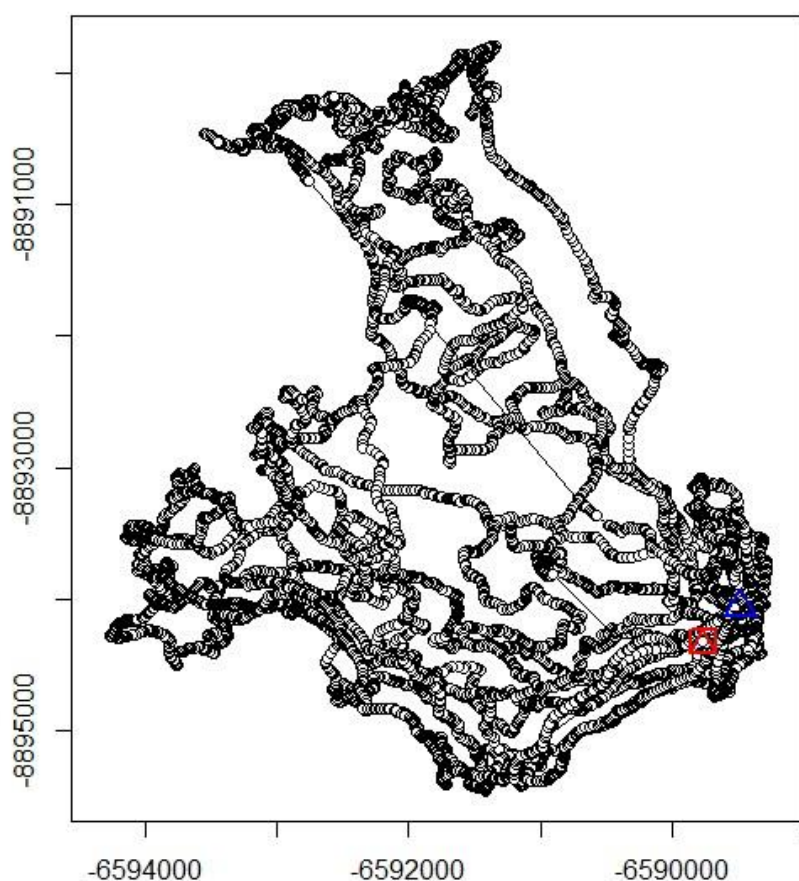

Figure S1. Sampling effort for searching for skuas nests in Harmony Point between 26 November 2019 and 15 January 2020. A hand-held GPS receiver was set to conduct an automatic background tracking while researchers searched for nests, recording in its internal memory one geographical fix each 5 seconds.
